# Supplementary material
Source: bioRxiv or medRxiv preprint supplement (https://medrxiv.org/highwire/filestream/74911/field_highwire_adjunct_files/0/2020.03.29.20046565-1.pdf)

**SUPPLEMENTARY MATERIAL for:**

Eco-epidemiological assessment of the COVID-19 epidemic in China, January-February 2020

Peter Byass

1. Figure 1a (high resolution)
2. Figure 1b (high resolution)
3. Figure 1c (high resolution)
4. Figure 1d (high resolution)
5. Figure 1e (high resolution)
6. Figure 1f (high resolution)
7. Figure 2 (high resolution)
8. Figure 3 (high resolution)
9. Map of maximum temperature, week 1
10. Map of minimum temperature, week 1
11. Map of solar radiation, week 1
12. Map of total precipitation, week 1
13. Map of maximum temperature, week 2
14. Map of minimum temperature, week 2
15. Map of solar radiation, week 2
16. Map of total precipitation, week 2
17. Map of maximum temperature, week 3
18. Map of minimum temperature, week 3
19. Map of solar radiation, week 3
20. Map of total precipitation, week 3
21. Map of maximum temperature, week 4
22. Map of minimum temperature, week 4
23. Map of solar radiation, week 4
24. Map of total precipitation, week 4
25. Map of maximum temperature, week 5
26. Map of minimum temperature, week 5
27. Map of solar radiation, week 5
28. Map of total precipitation, week 5
29. Map of maximum temperature, week 6
30. Map of minimum temperature, week 6
31. Map of solar radiation, week 6
32. Map of total precipitation, week 6
33. Map of maximum temperature, week 7
34. Map of minimum temperature, week 7
35. Map of solar radiation, week 7
36. Map of total precipitation, week 7
37. Map of maximum temperature, week 8
38. Map of minimum temperature, week 8
39. Map of solar radiation, week 8
40. Map of total precipitation, week 8
41. Map of maximum temperature, week 9
42. Map of minimum temperature, week 9
43. Map of solar radiation, week 9
44. Map of total precipitation, week

[a] COVID-19 cases

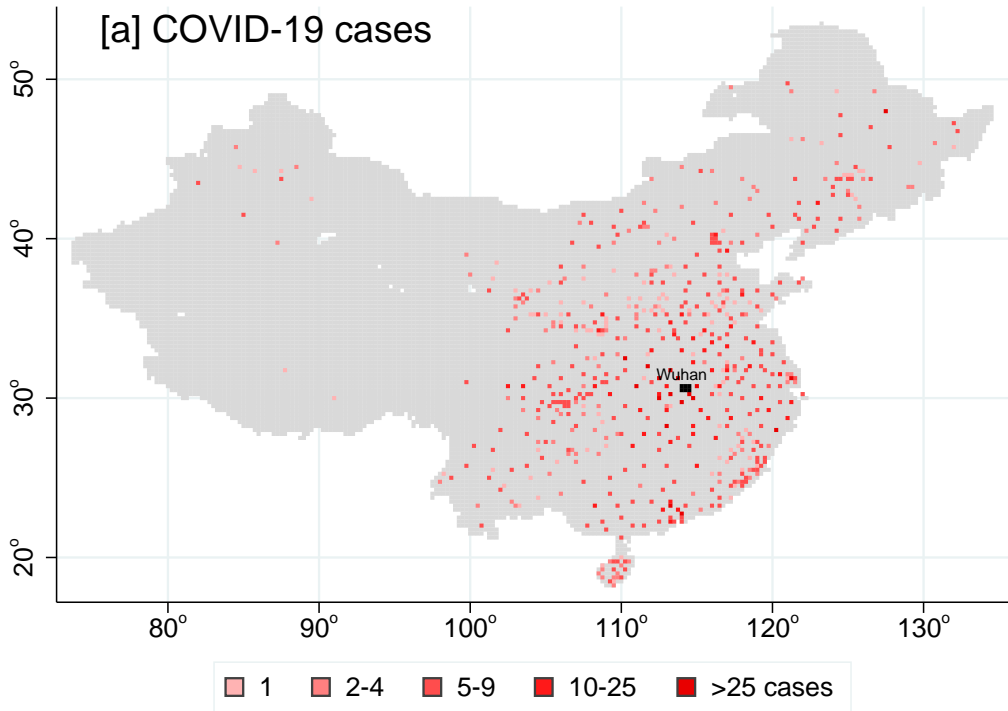

[b] population density

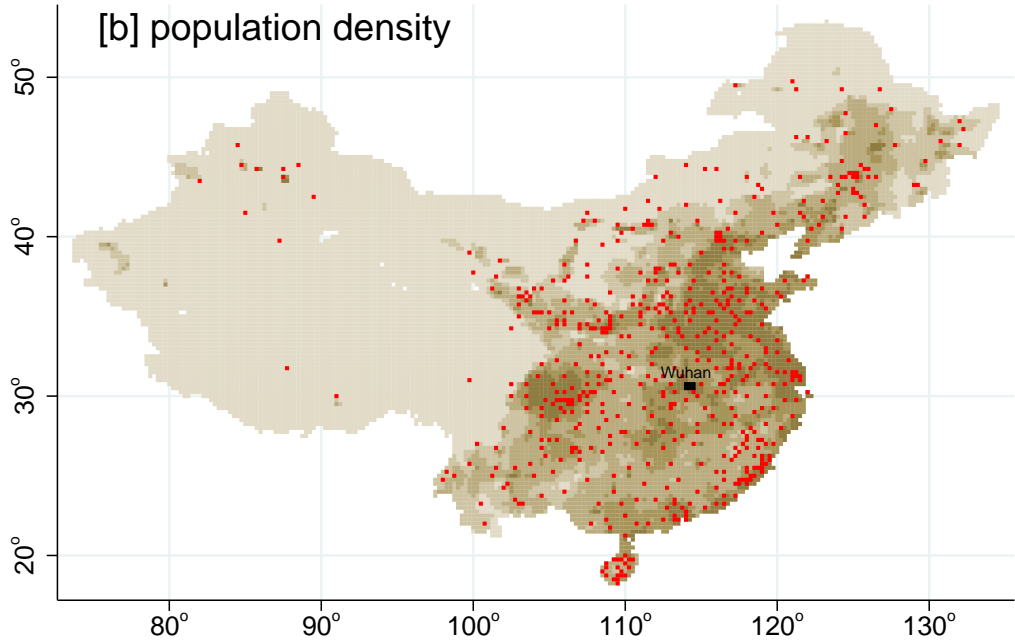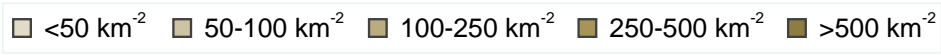

[c] maximum temperature

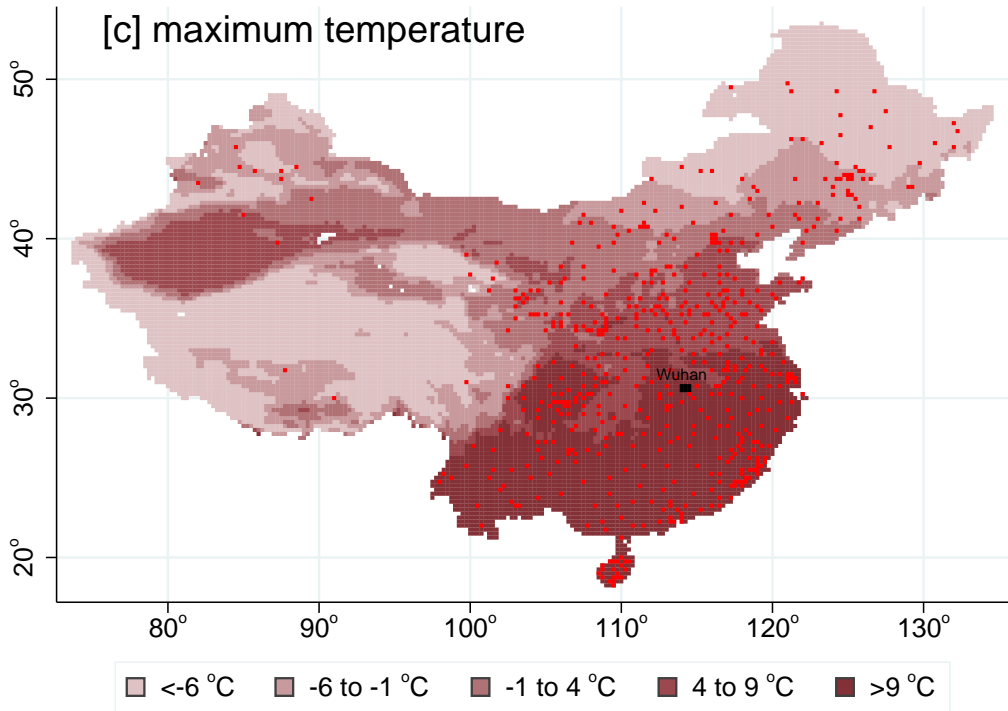

[d] minimum temperature

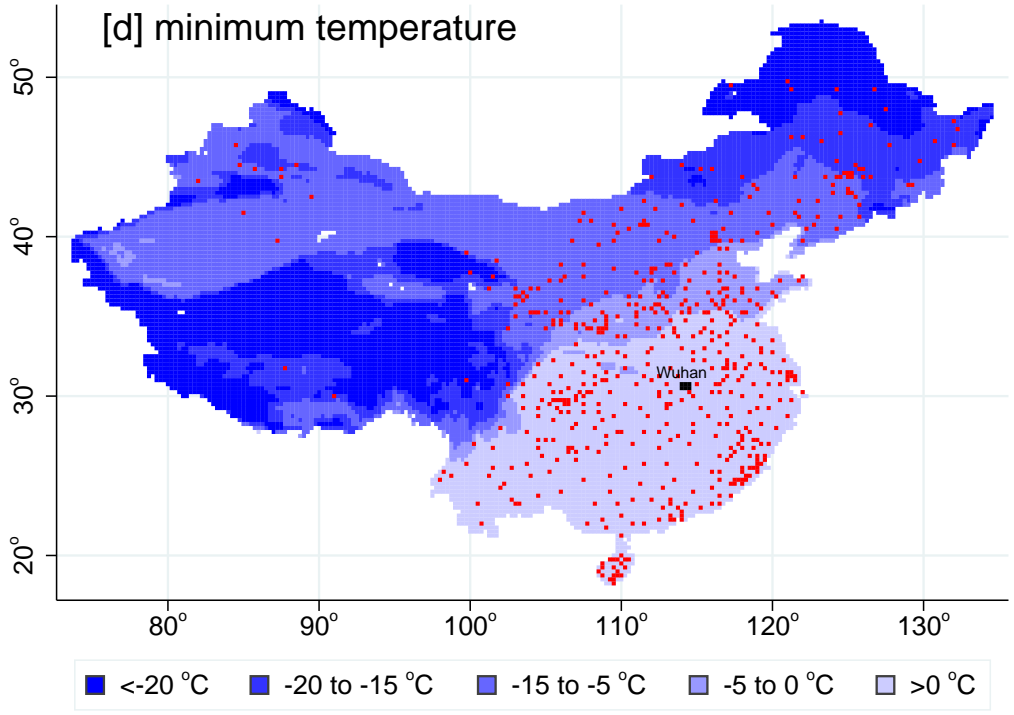

[e] solar radiation

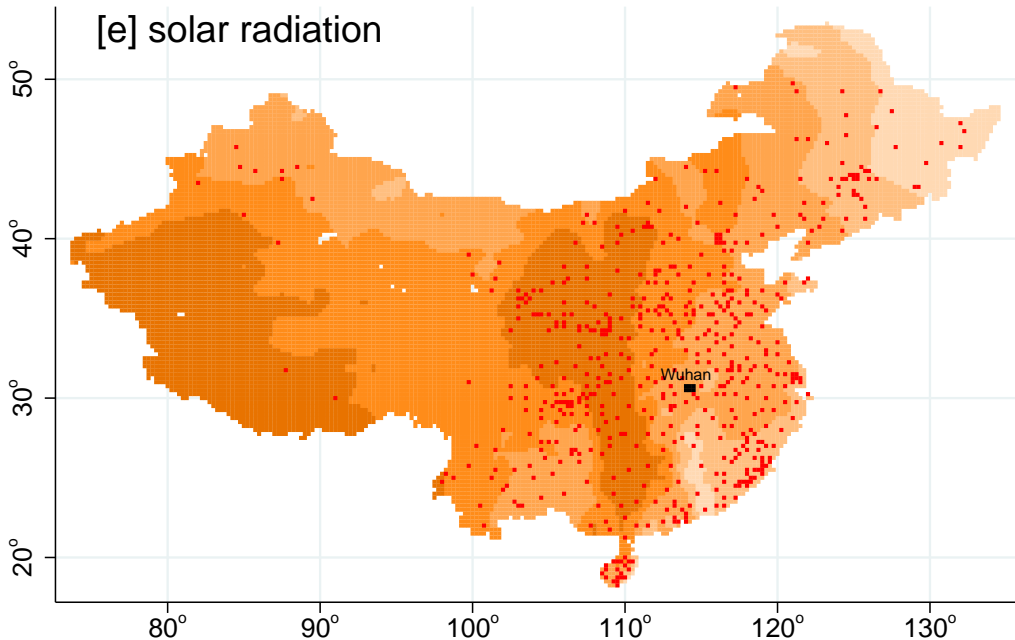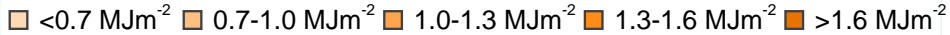

[f] total precipitation

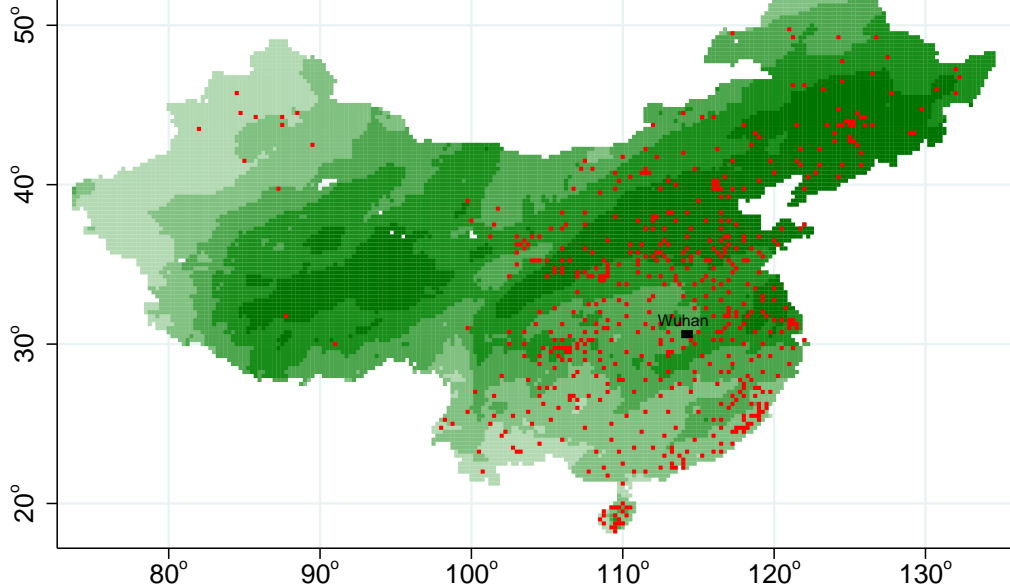

 <20 mm     20-40 mm     40-70 mm     70-110 mm     >110 mm

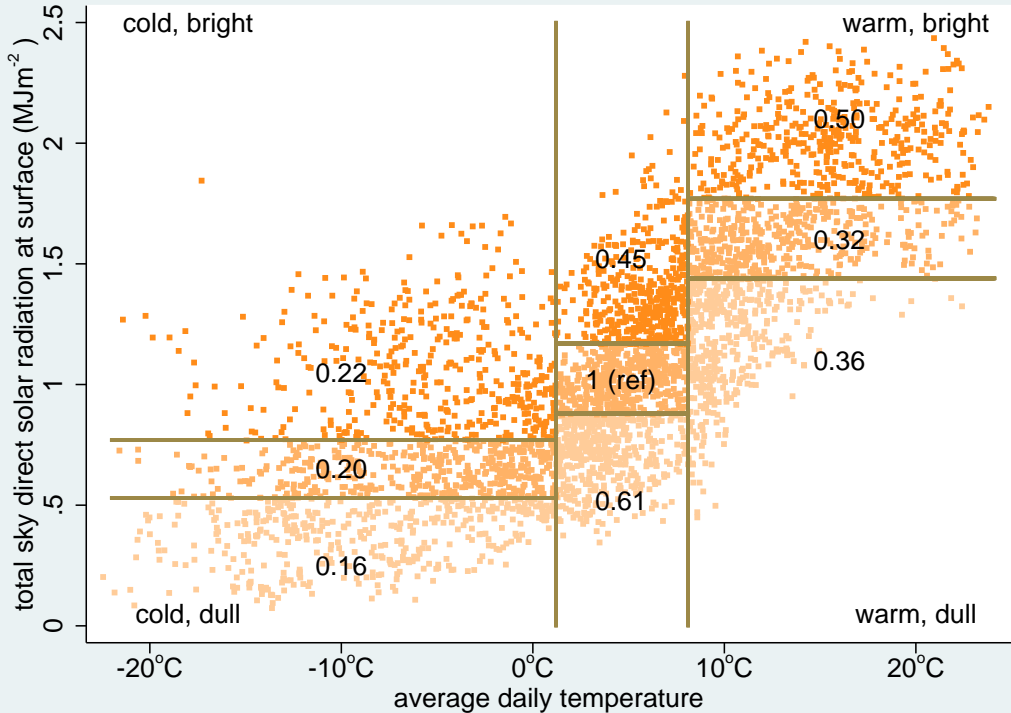



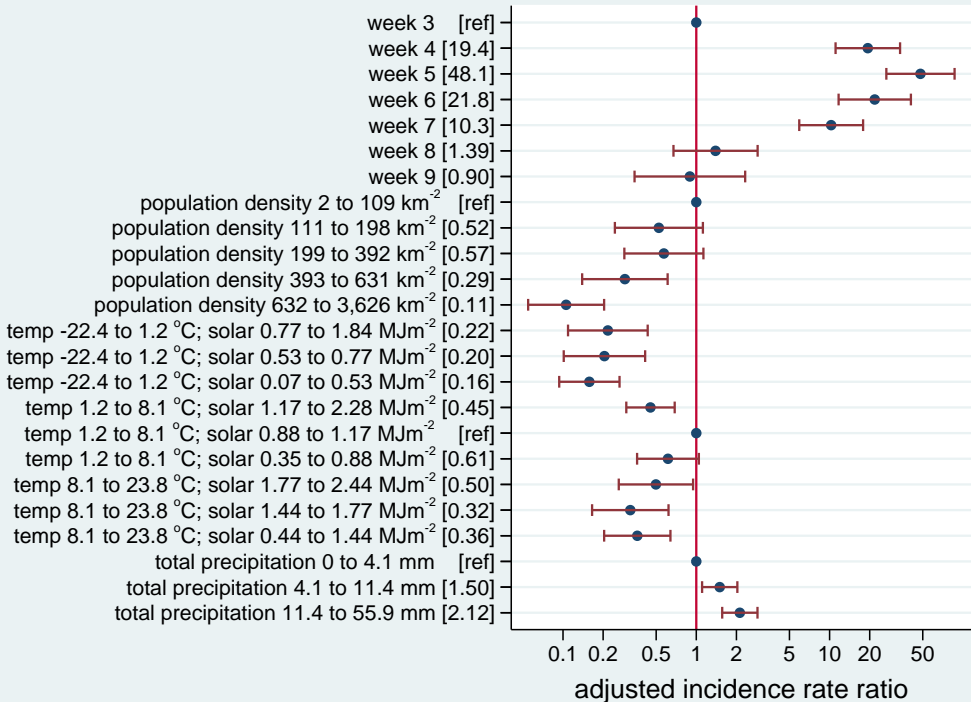

# week 1 maximum temperature

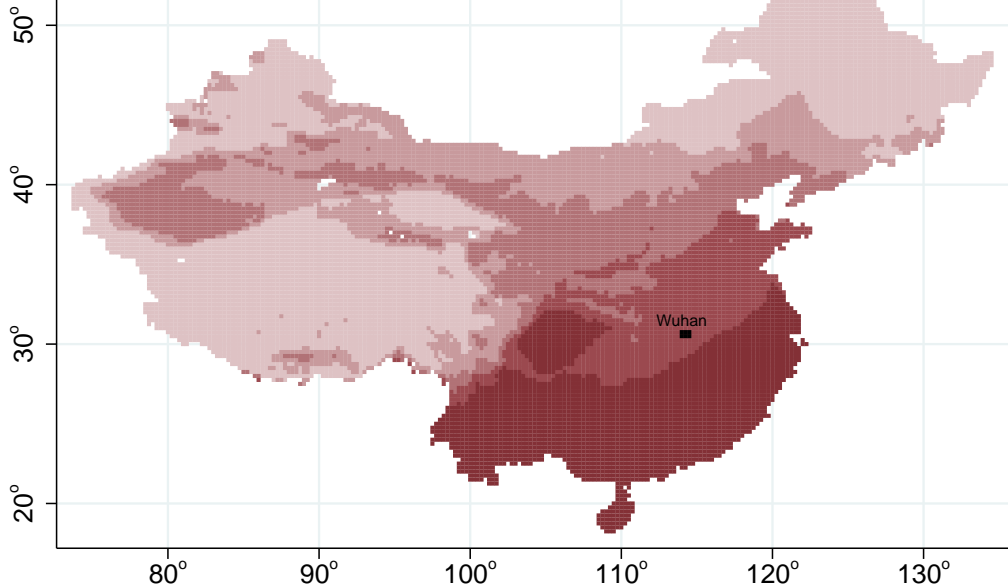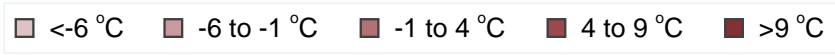

# week 1 minimum temperature

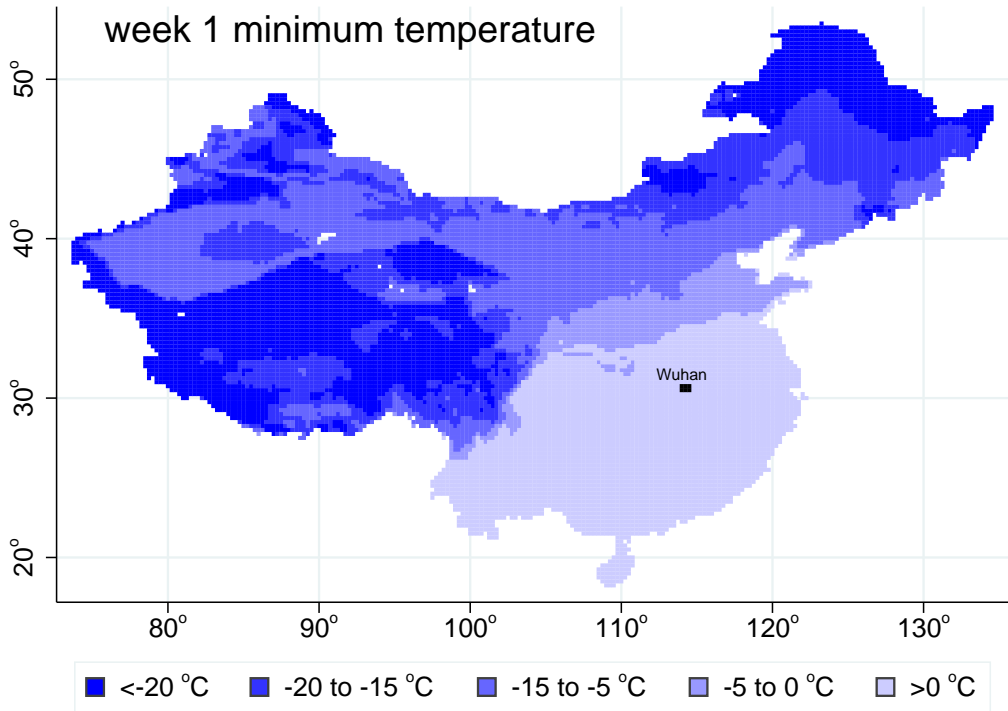

# week 1 solar radiation

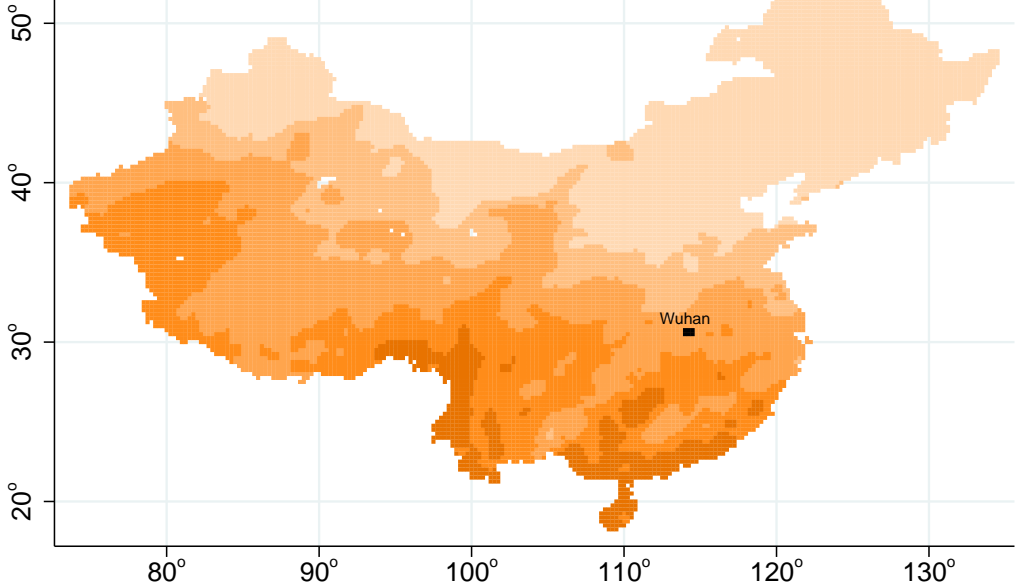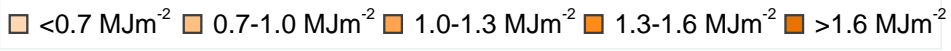

# week 1 total precipitation

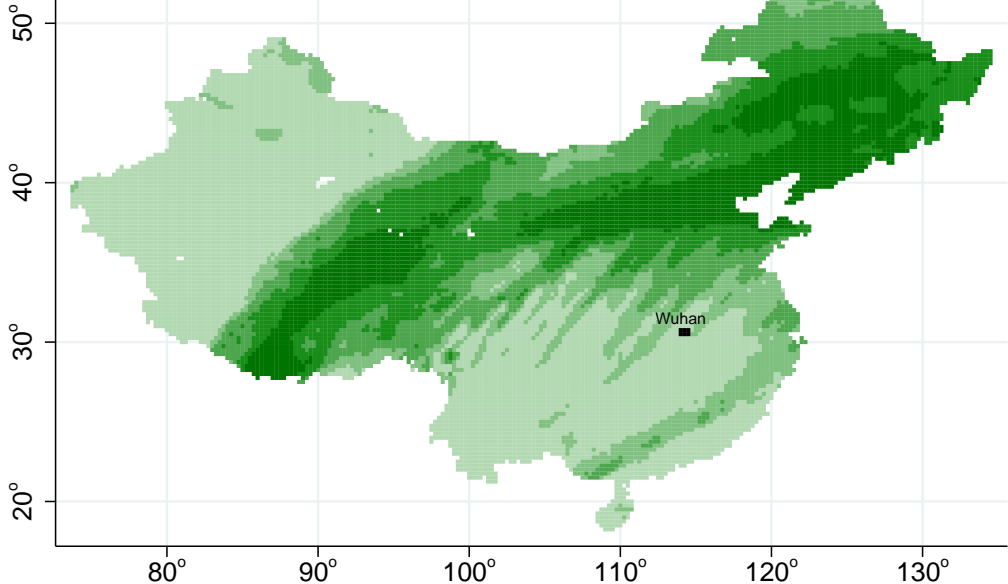

Wuhan

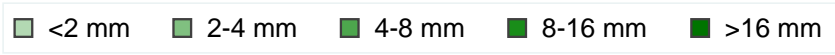

# week 2 maximum temperature

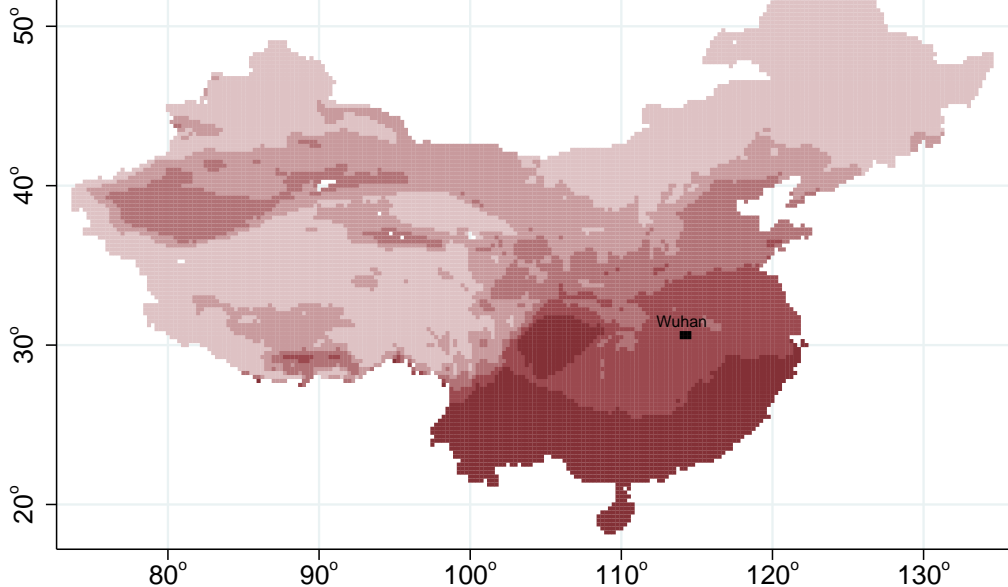

# week 2 minimum temperature

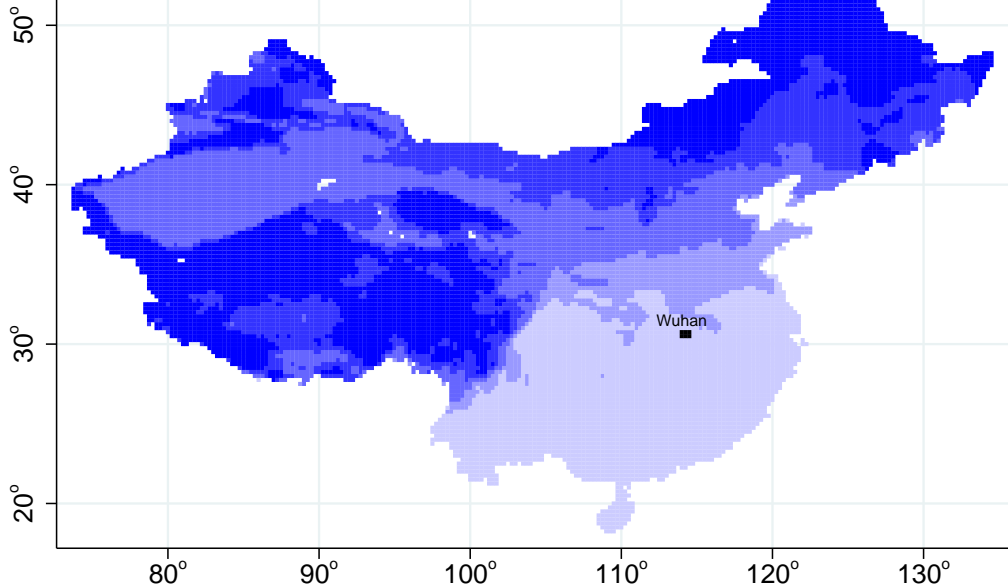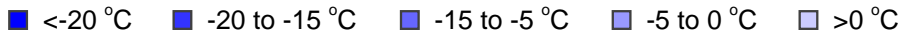

# week 2 solar radiation

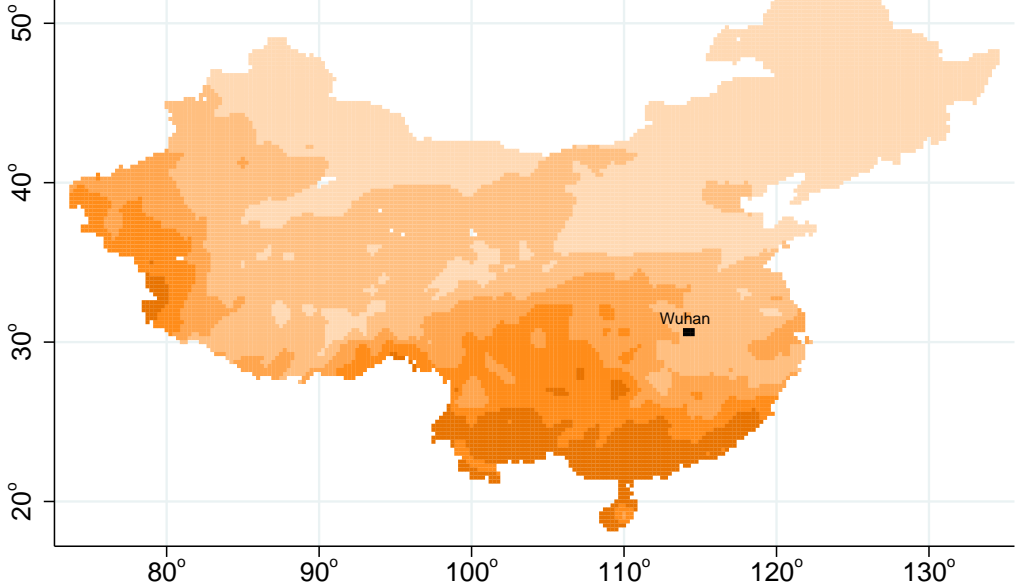



# week 2 total precipitation

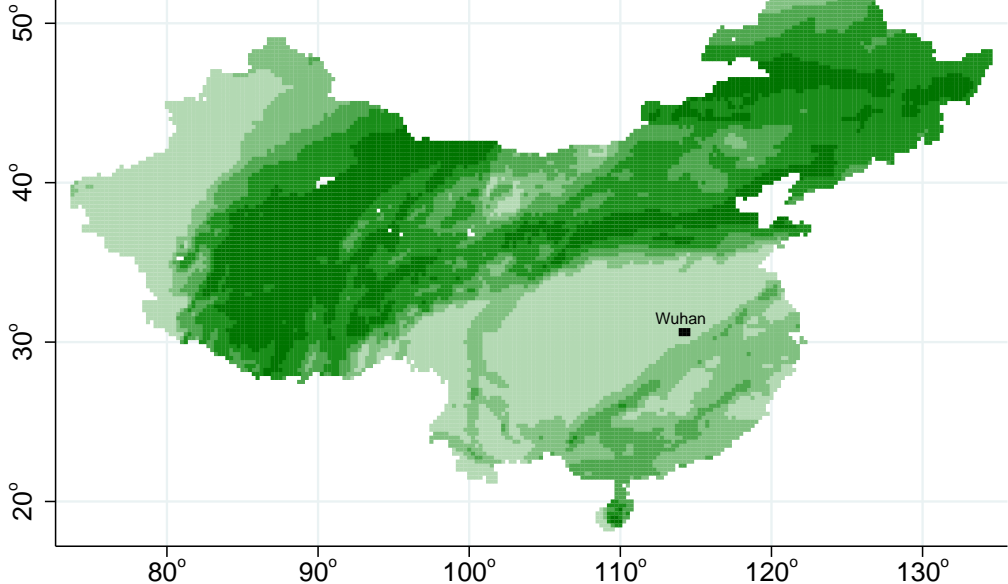

# week 3 maximum temperature

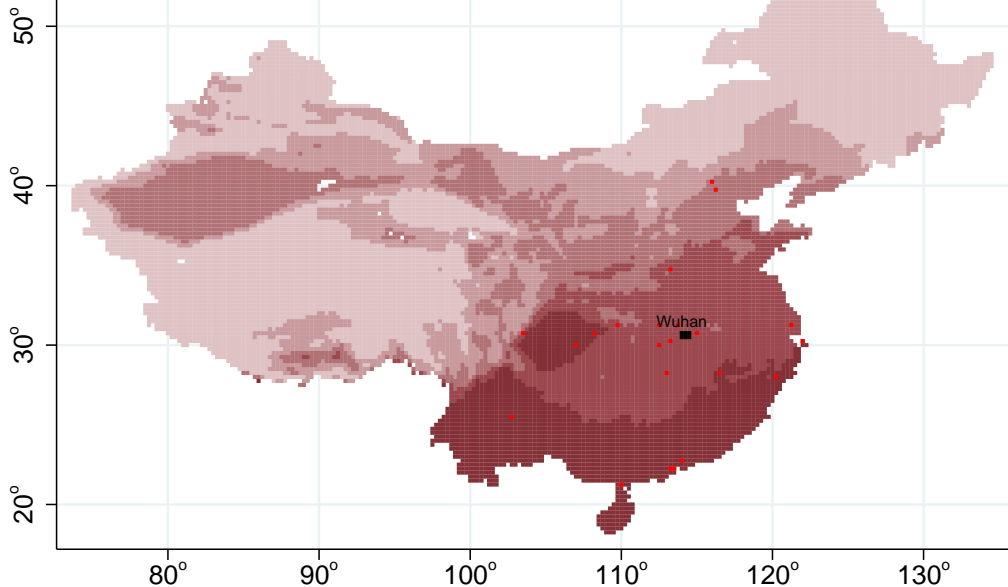

# week 3 minimum temperature

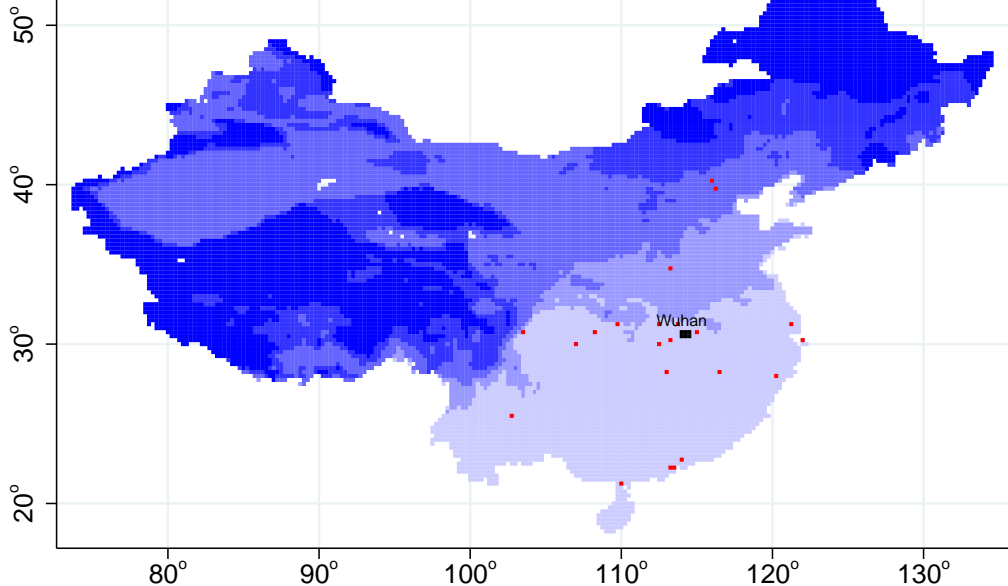

# week 3 solar radiation

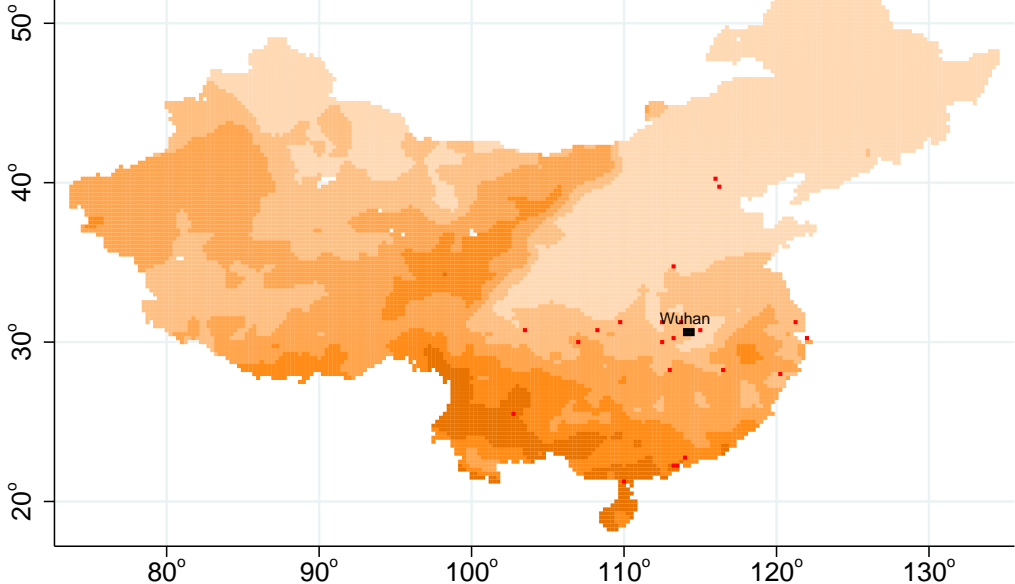

# week 3 total precipitation

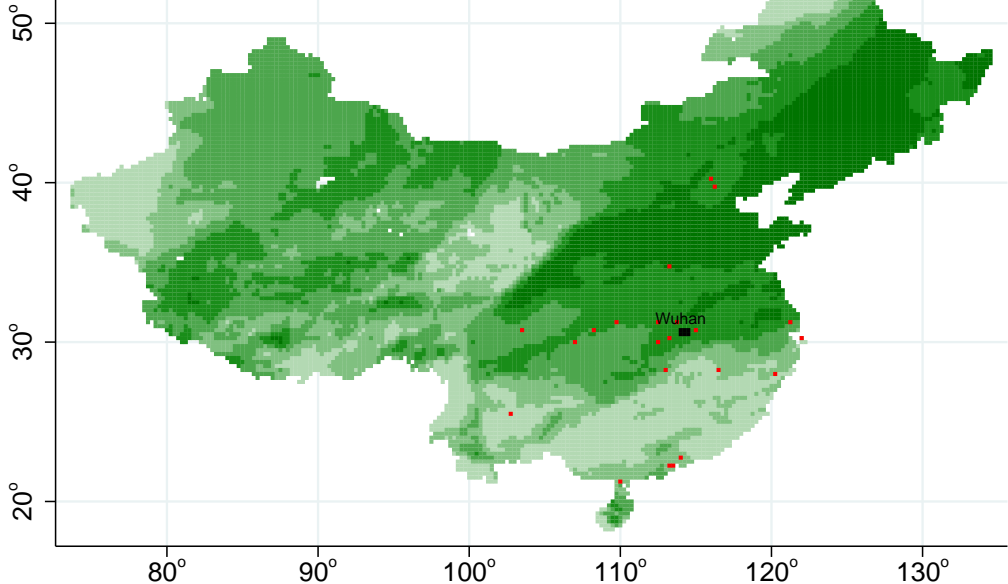

# week 4 maximum temperature

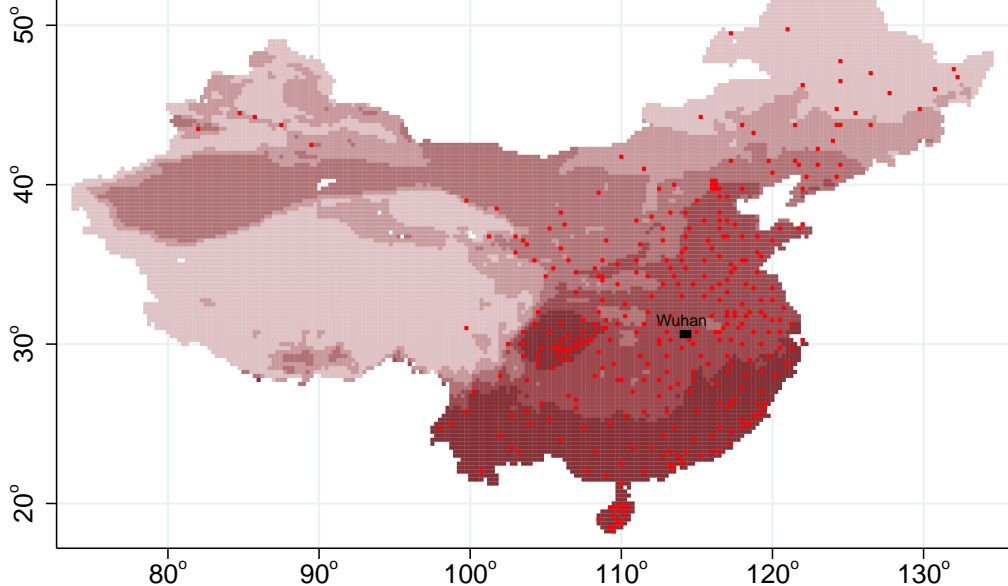

# week 4 minimum temperature

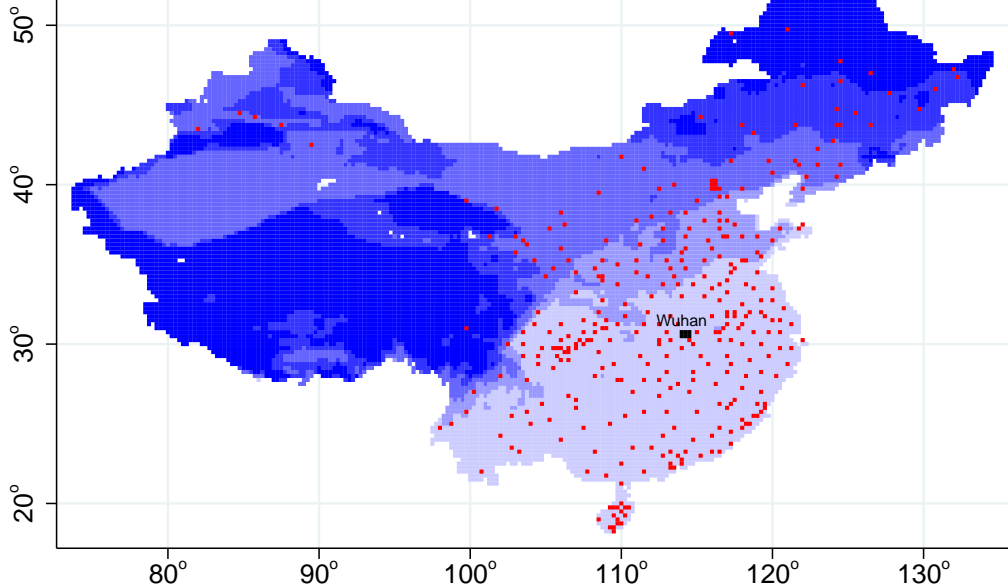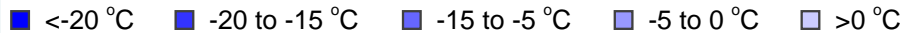

# week 4 solar radiation

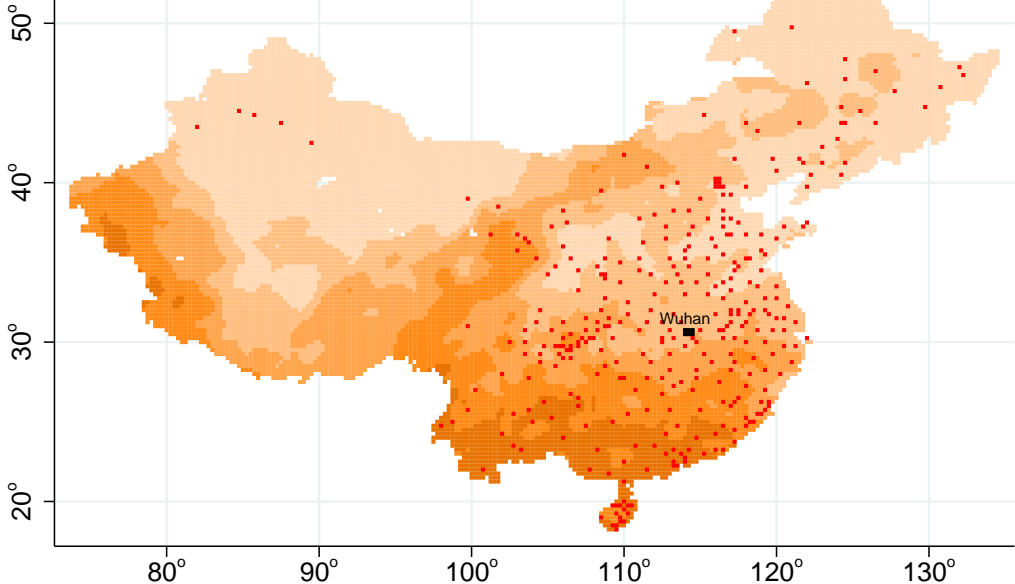



# week 4 total precipitation

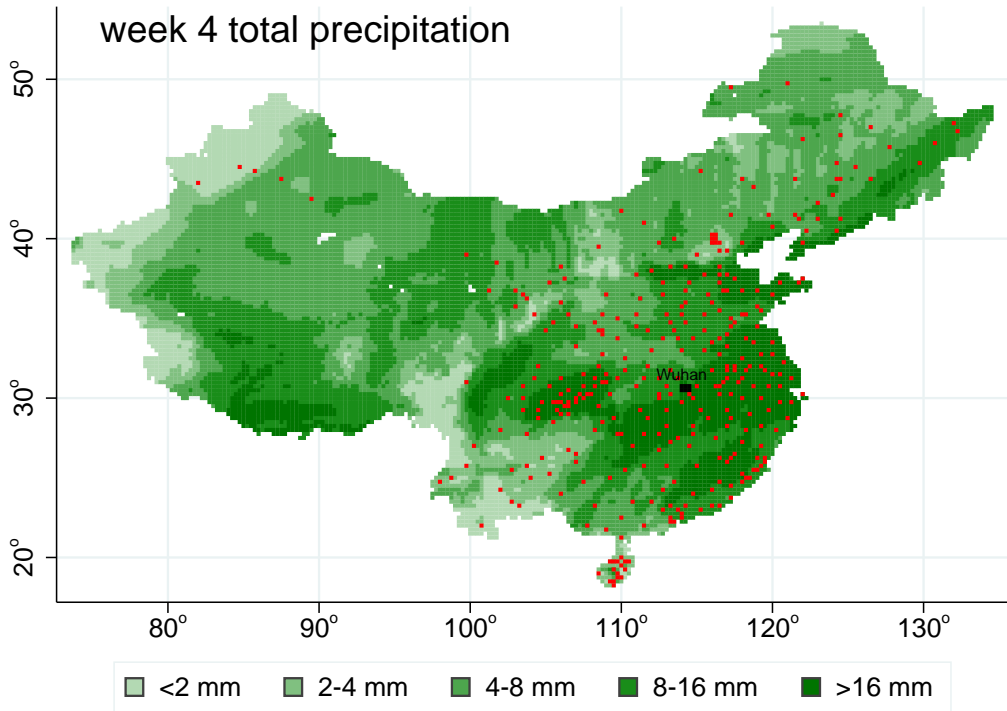

# week 5 maximum temperature

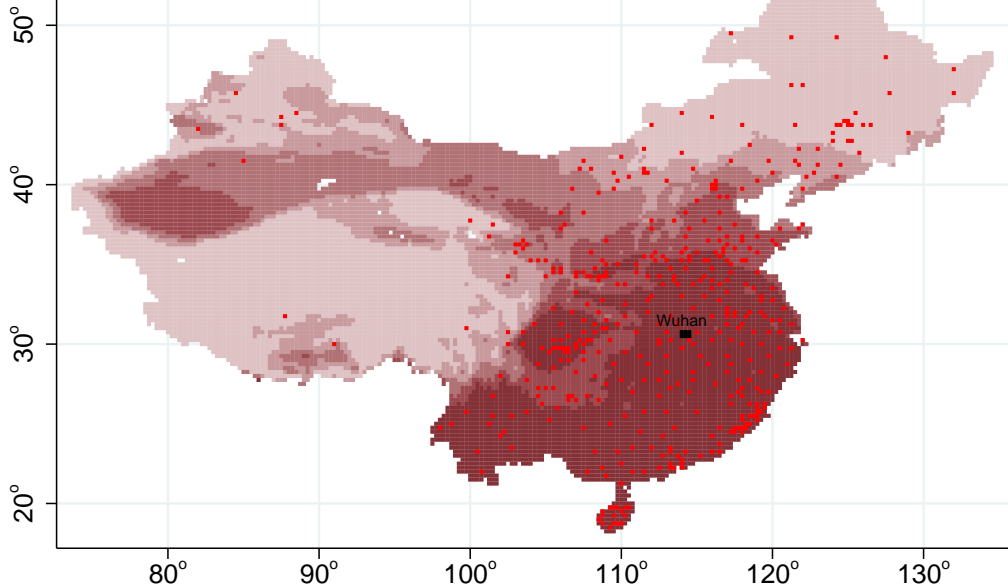

# week 6 minimum temperature

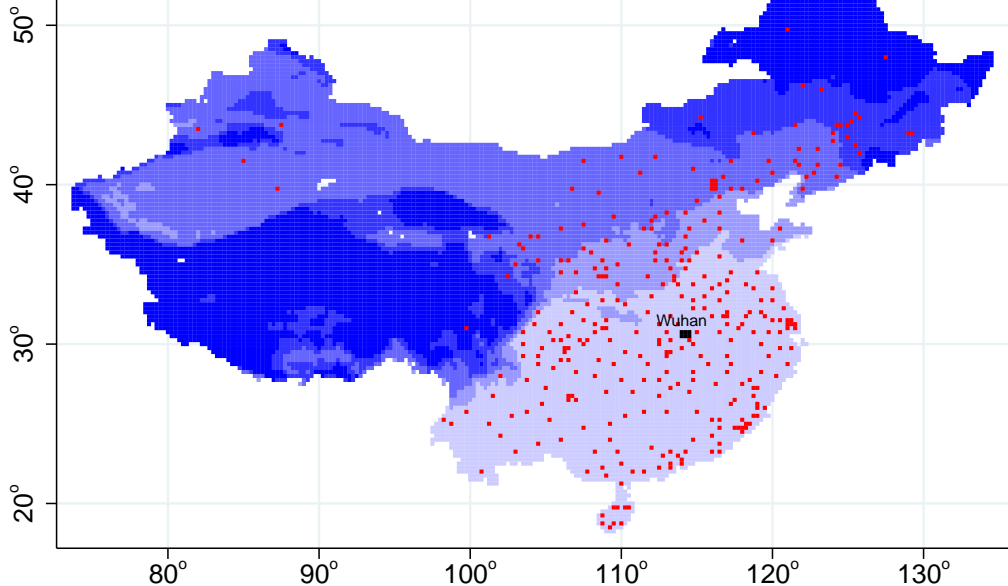

# week 6 solar radiation

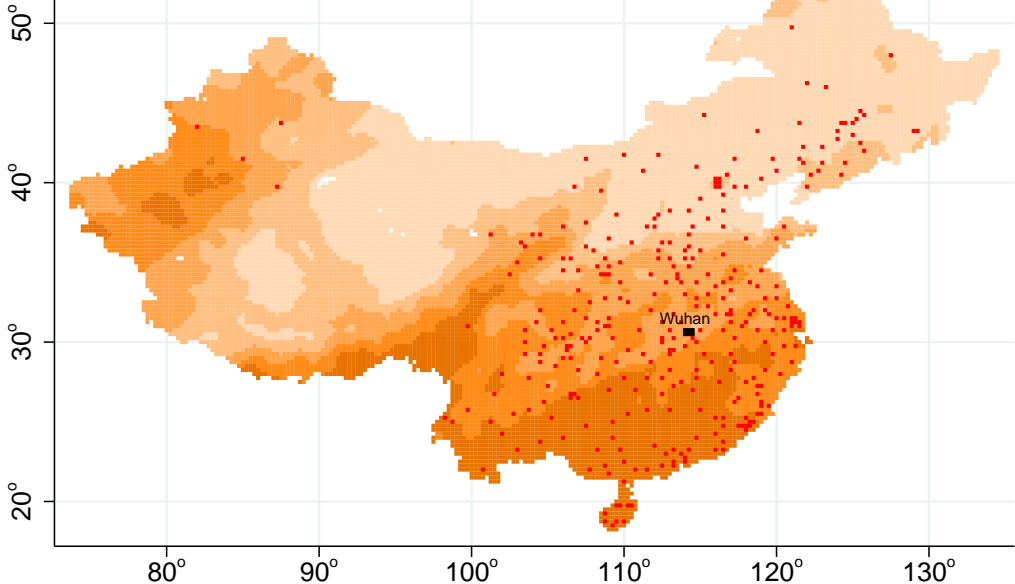

# week 6 total precipitation

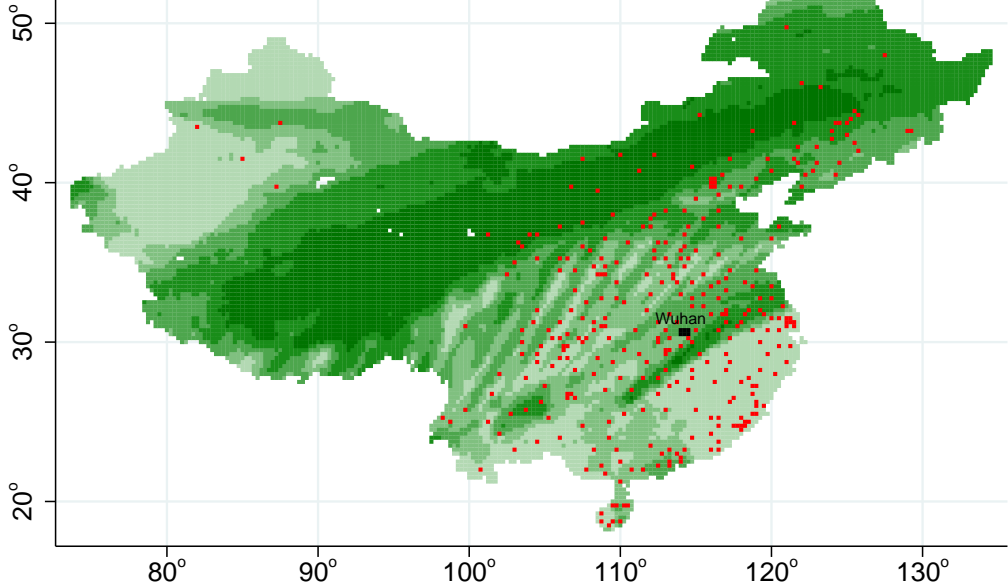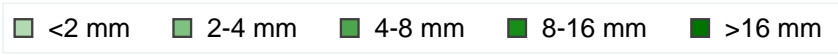

# week 7 maximum temperature

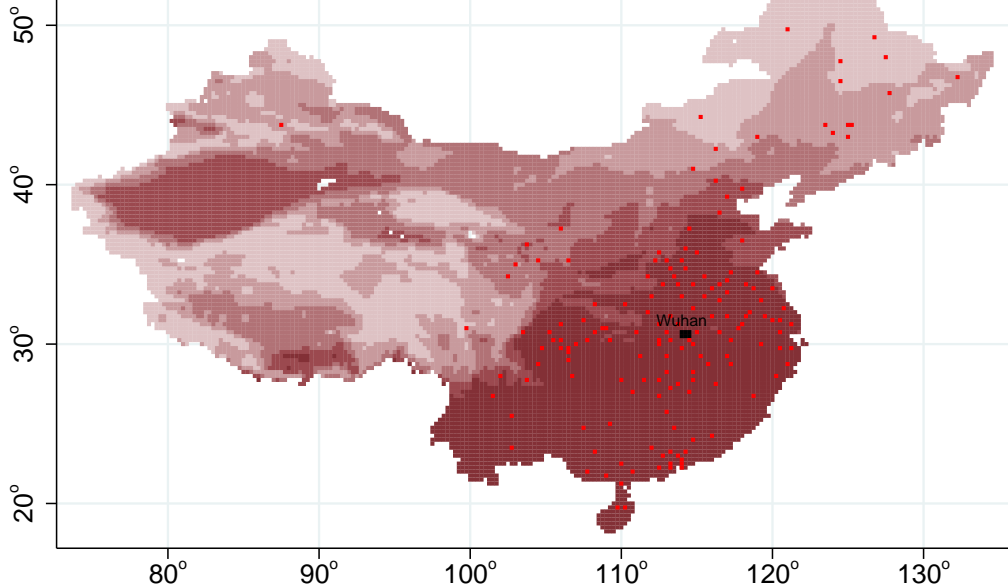

# week 7 minimum temperature

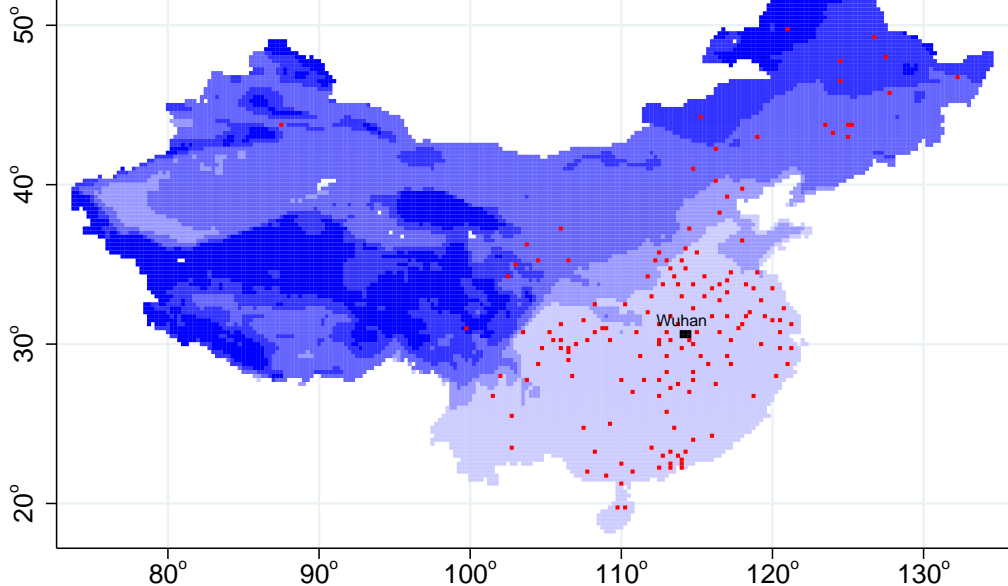

# week 7 solar radiation

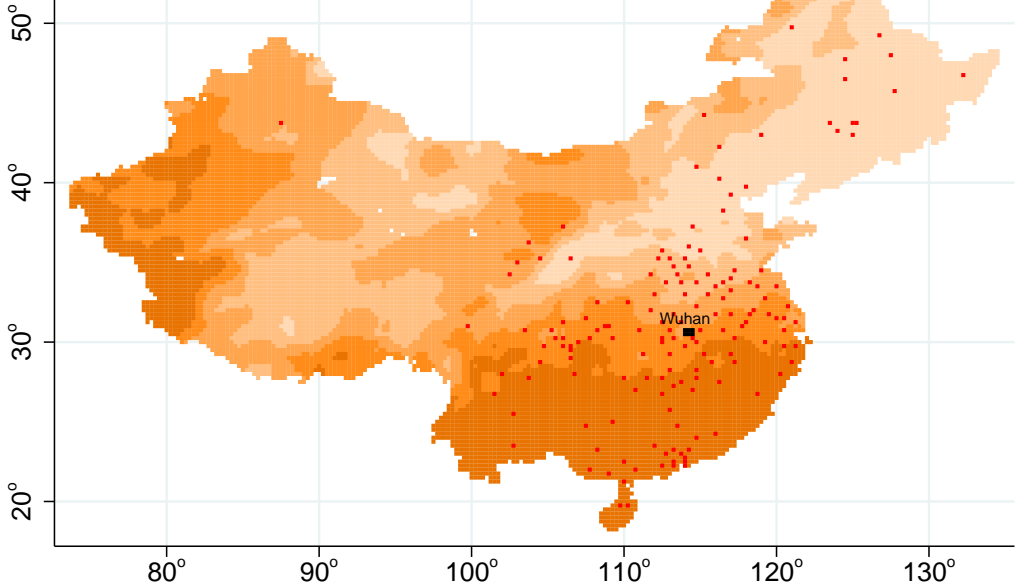



# week 7 total precipitation

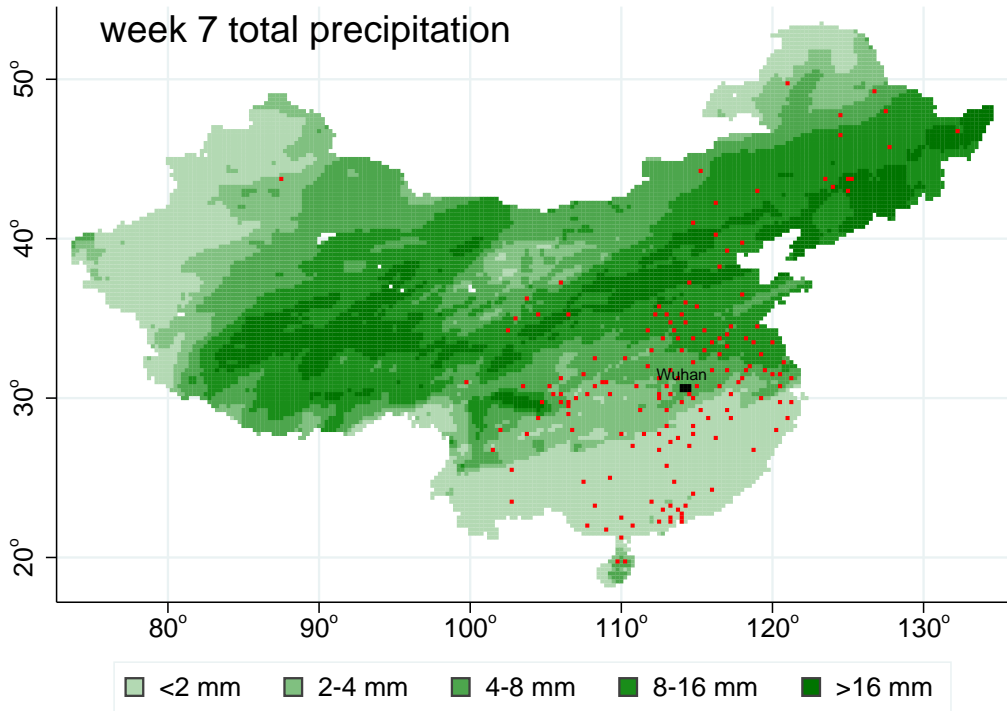

# week 8 maximum temperature

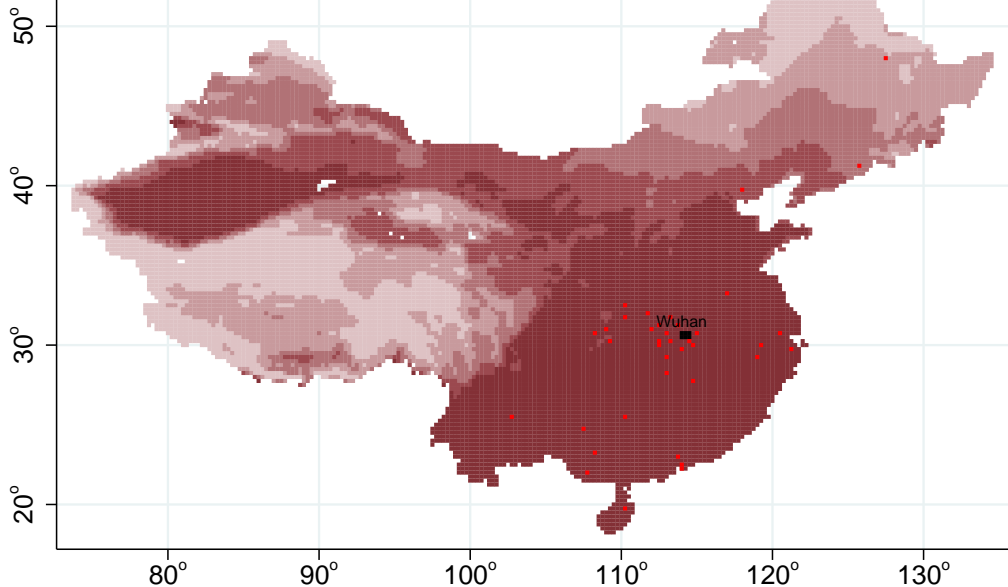

# week 8 minimum temperature

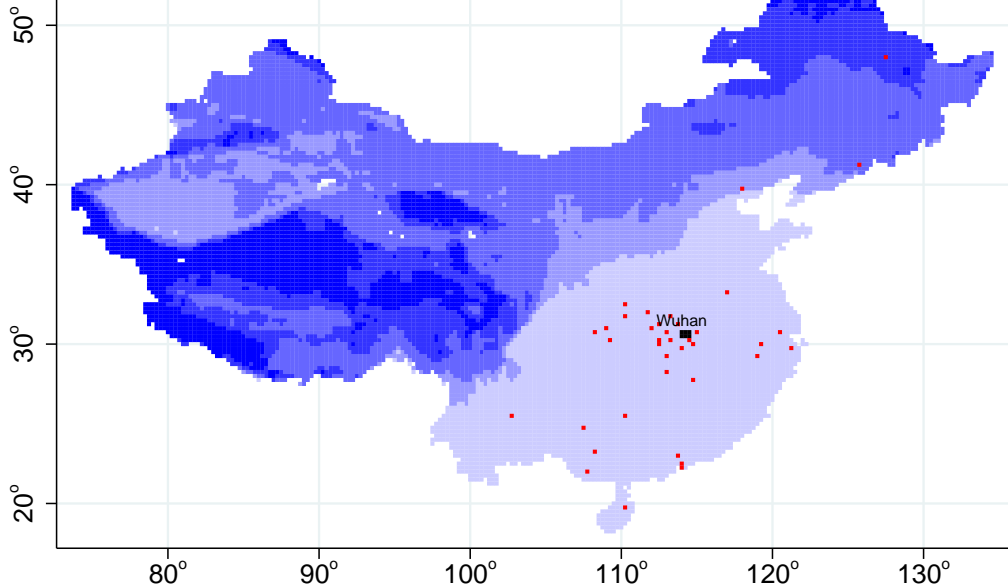

# week 8 solar radiation

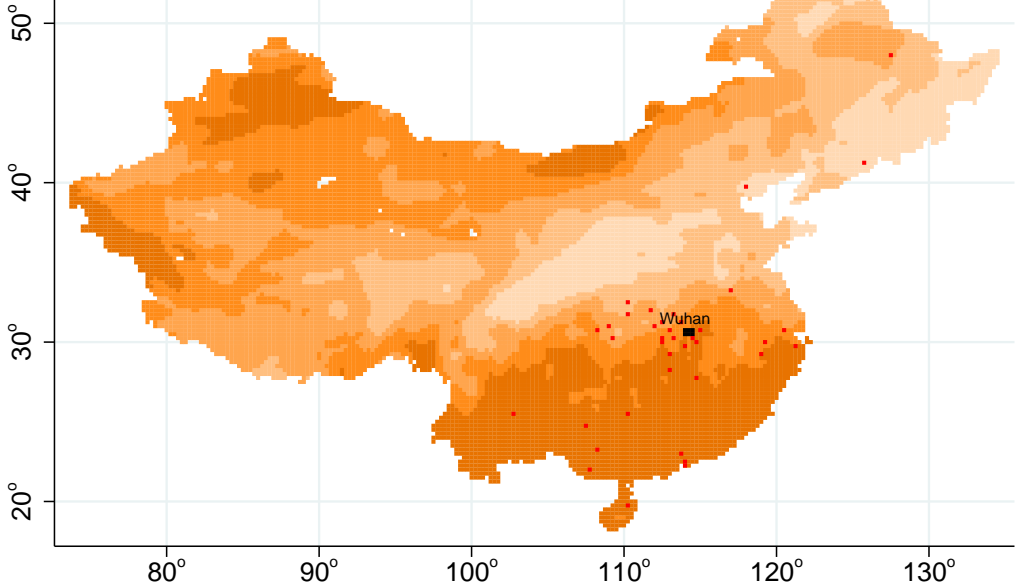

# week 8 total precipitation

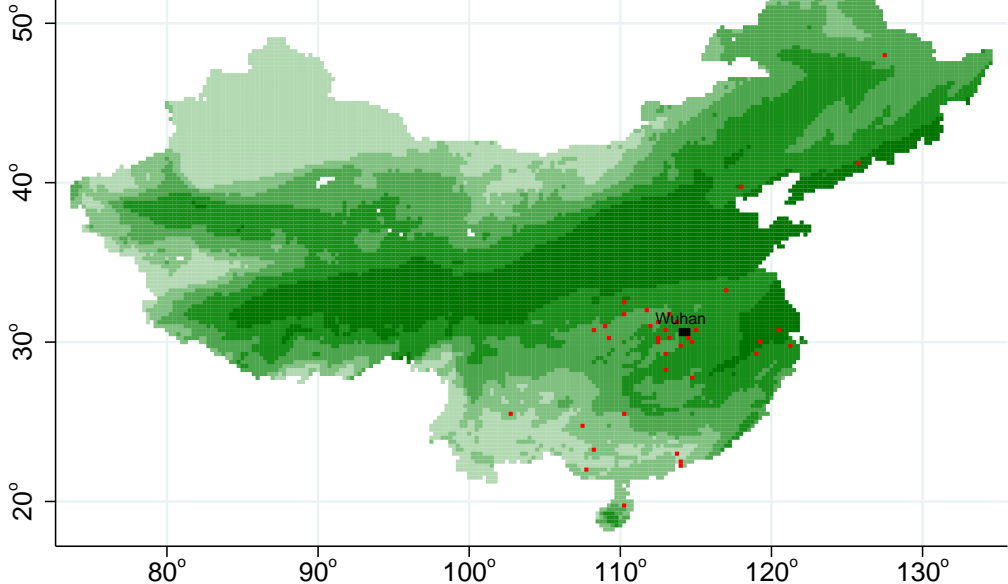

# week 9 maximum temperature

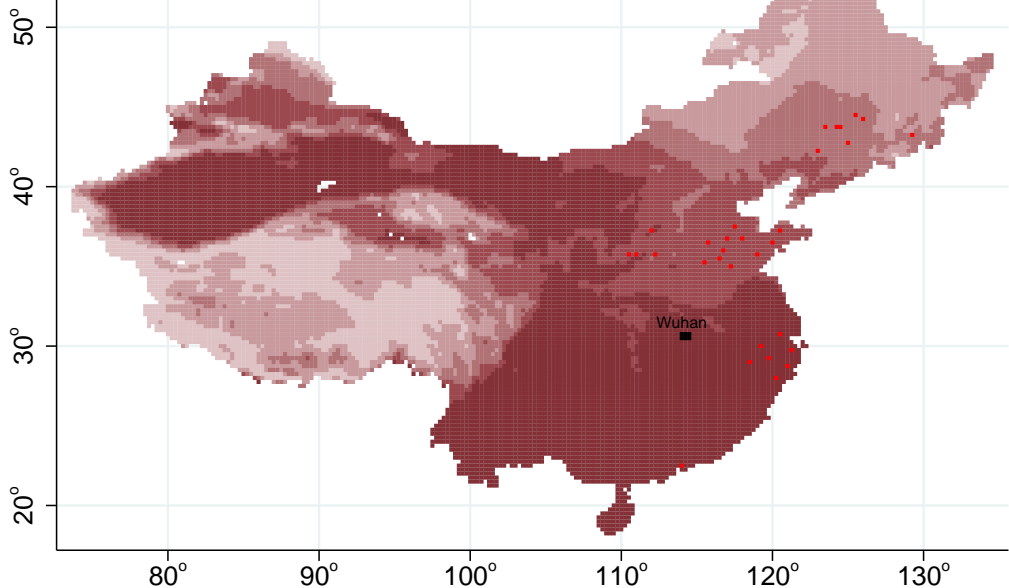

# week 9 minimum temperature

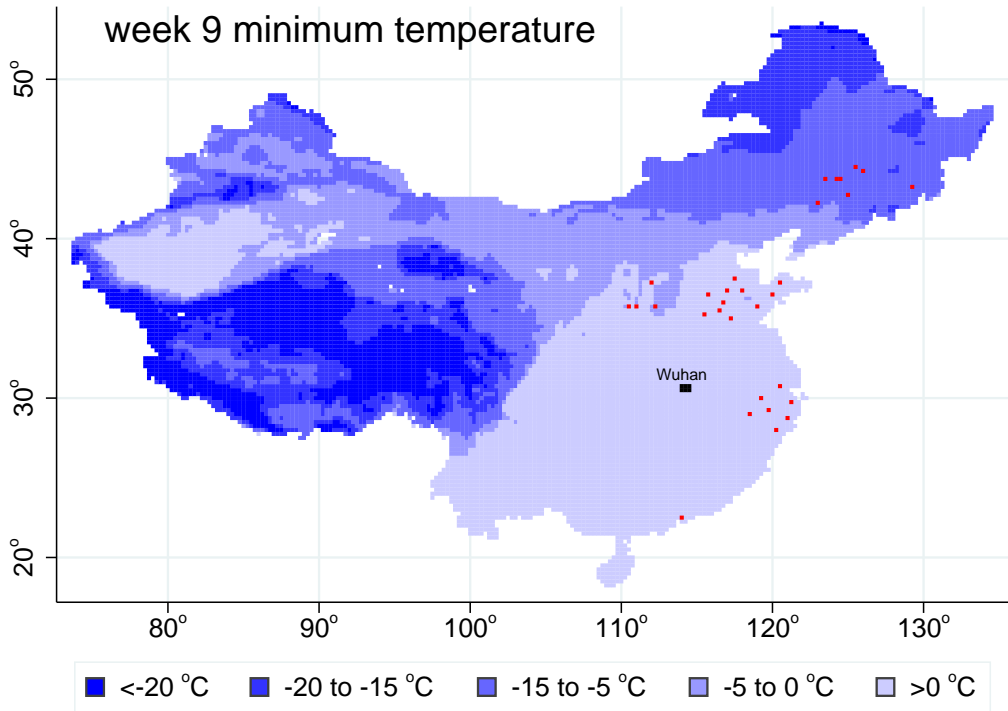

# week 9 solar radiation

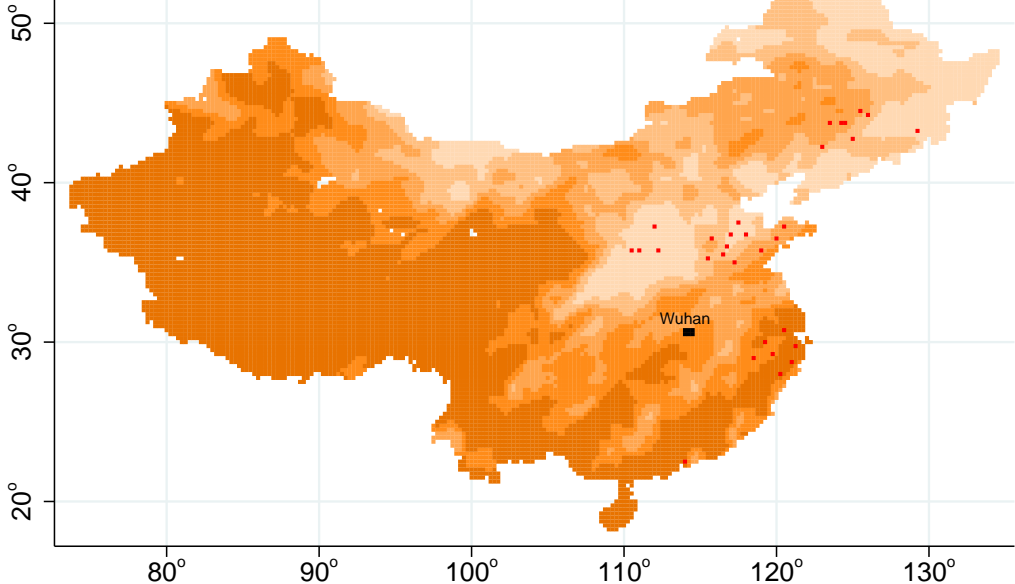



# week 9 total precipitation

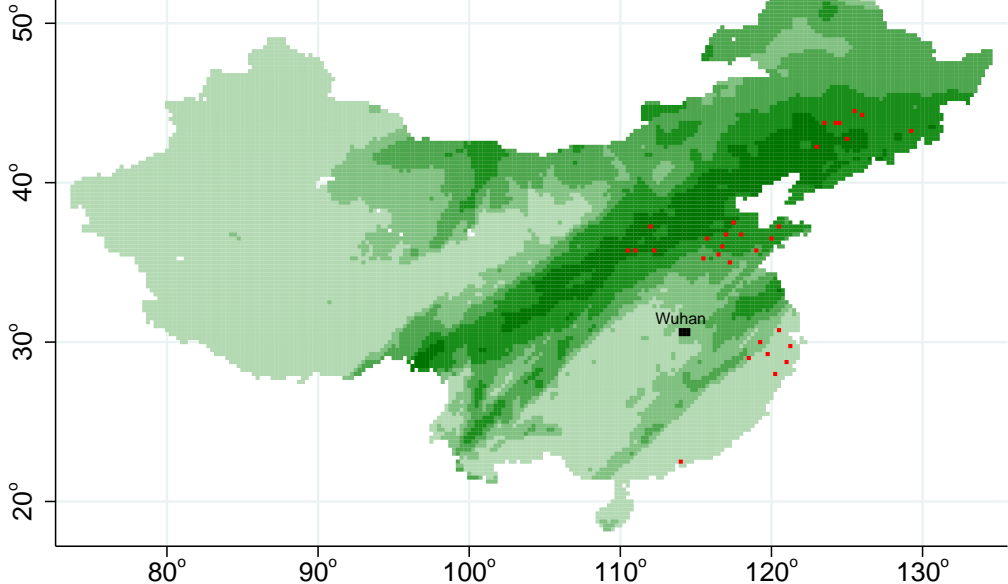

Supplement: Supplementary file [file 2020.03.29.20046565-1.pdf]
